# Supplementary material for: A Systematic Screen to Discover and Analyze Apicoplast Proteins Identifies a Conserved and Essential Protein Import Factor
Source: PubMed Central journal article supplement (PMC3228799; doi:10.1371/journal.ppat.1002392), 2011-12-01
Supplement: ppat.1002392.s009.pdf [file ppat.1002392.s009.pdf]

Result of attempt and DNA cloning information for tagging of 57 apicoplast proteins encoding genes

| Gene ID       | Predicted product                                                   | Result of attempt | LIC F primer                              | LIC R primer                                | Size (bp) | Enzyme     | RNA seq test comment             |
|---------------|---------------------------------------------------------------------|-------------------|-------------------------------------------|---------------------------------------------|-----------|------------|----------------------------------|
| TGME49_007100 | hypothetical protein                                                | cc                | TACTTCCAATCCAATTTAATGCCACCCGGAGAAGACGC    | TCCTCCACTTCCAATTTAGCTTCTATCCGAATACAAGACGC   | 809       | EcoRV      |                                  |
| TGME49_110770 | hypothetical protein, conserved                                     | Apicoplast        | TACTTCCAATCCAATTTAATGCATAGATATCTACATACTCC |                                             | 630       | EcoRV      |                                  |
| TGME49_073730 | hypothetical protein                                                | NS                | TACTTCCAATCCAATTTAATGCAGTAACATTTATGGGTAG  | TCCTCCACTTCCAATTTAGCGGAGTTCGCATCATTTGCGGAG  | 1667      | AvrII      | pred Ct match RNAseq             |
| TGME49_068830 | hypothetical protein, conserved                                     | Mitochondria      | TACTTCCAATCCAATTTAATGCTTGAGACAGCCAAAGACG  |                                             | 1822      | BstBI      |                                  |
| TGME49_021920 | hypothetical protein                                                | Apicoplast        | TACTTCCAATCCAATTTAATGCATGCTGTGGTCTTTCGGA  | TCCTCCACTTCCAATTTAGCAGGCTCAGGTTCCAATC       | 1599      | NsiI       |                                  |
| TGME49_021330 | DNA gyrase subunit A,                                               | Apicoplast        | TACTTCCAATCCAATTTAATGCTTCGCTCCGCTGTGTGT   | TCCTCCACTTCCAATTTAGCGTCTTCTGGTGTCTGCTCTT    | 1779      | NcoI       |                                  |
| TGME49_014500 | protamine P1, putative                                              | Nucleus           | TACTTCCAATCCAATTTAATGCCACTCGAAGCCGGGTG    | TCCTCCACTTCCAATTTAGCTTCTCATCTTCGTCATCTTG    | 2133      | SnaBI      |                                  |
| TGME49_008840 | ATP-dependent DNA helicase, putative                                | Apicoplast        | TACTTCCAATCCAATTTAATGCCGACGGAAGAAAGGGAT   | TCCTCCACTTCCAATTTAGCAACTCTAAACAACCAAGTCTAT  | 2879      | EcoRV      |                                  |
| TGME49_090030 | hypothetical protein, conserved                                     | cc                | TACTTCCAATCCAATTTAATGCCGTTGAGCGGATGTCTGG  | TCCTCCACTTCCAATTTAGCATGGTGTCCAGCGGCTTCC     | 1666      | MluI       | pred Ct match RNAseq             |
| TGME49_078170 | hypothetical protein                                                | cc                | TACTTCCAATCCAATTTAATGCAGGAGCCGCTGCCG      | TCCTCCACTTCCAATTTAGCCACCCGGCAAGAAAACGC      | 852       | PmlI       | pred Ct match RNAseq, UTR longer |
| TGME49_078170 | hypothetical protein                                                | cc                |                                           |                                             |           |            |                                  |
| TGME49_087270 | hypothetical protein                                                | Apicoplast        | TACTTCCAATCCAATTTAATGCCGCGAGCCTGAAGCTCC   | TCCTCCACTTCCAATTTAGCCATACCAAGTTTACGCTGAG    | 816       | EcoRV      |                                  |
| TGME49_049690 | hypothetical protein                                                | Mitochondria      | TACTTCCAATCCAATTTAATGCCCCCGTCTCGCGTCTG    | TCCTCCACTTCCAATTTAGCGGCTTTTTCAGACGTTTCTG    | 1245      | PstI       |                                  |
| TGME49_118150 | major facilitator superfamily domain-containing protein             | cc                | TACTTCCAATCCAATTTAATGCCGTACATGTTCGCGCG    | TCCTCCACTTCCAATTTAGCGTGTGCACTGTGACAGCCA     | 1279      | ApaI       | pred Ct match RNAseq, UTR longer |
| TGME49_090860 | amino acid transporter,                                             | NS                | TACTTCCAATCCAATTTAATGCCGACCCGGGGCGC       | TCCTCCACTTCCAATTTAGCAGCTTCAACAACAGGCTCGA    | 1217      | MluI       | pred Ct match RNAseq             |
| TGME49_016790 | ABC transporter, putative                                           | NS                | TACTTCCAATCCAATTTAATGCAGGAGTGGCGGCC       | TCCTCCACTTCCAATTTAGCAGCTGCTCGAGCATGAAAT     | 1835      | MluI       | pred Ct match RNAseq             |
| TGME49_090600 | succinyl-CoA ligase alpha subunit, putative                         | cc                | TACTTCCAATCCAATTTAATGCCACCCCTTCGCT        | TCCTCCACTTCCAATTTAGCGTGAAGCCGGCCGCC         | 1464      | XcmI       | pred Ct match RNAseq             |
| TGME49_090670 | cytosol aminopeptidase                                              | NS                | TACTTCCAATCCAATTTAATGCATTCCTCTCTGTGCGGGA  | TCCTCCACTTCCAATTTAGCGTCTCTTTCGTTTGTGTGCT    | 1688      | PmlI       | pred Ct match RNAseq             |
| TGME49_078160 | hypothetical protein                                                | Cytosol           | TACTTCCAATCCAATTTAATGCTTCCACAGCTTTAGAGGC  | TCCTCCACTTCCAATTTAGCTTCCCGGCACAGCCAGAAG     | 969       | SnaBI      |                                  |
| TGME49_047930 | syntaxin, putative                                                  | cc                | TACTTCCAATCCAATTTAATGCCGGCAGCGGAGAAAGCC   | TCCTCCACTTCCAATTTAGCGGTGTGTTTCAIGATCAGCAG   | 2466      | PmlI       | pred Ct match RNAseq, UTR longer |
| TGME49_015420 | SNARE protein, putative gamma-tubulin complex component 2, putative | NS                | TACTTCCAATCCAATTTAATGCTGCGGCGTTTCCCAGATG  | TCCTCCACTTCCAATTTAGCGTAAAGCTGACAGCACTGAT    | 1568      | BstBI      | pred Ct match RNAseq             |
| TGME49_063510 | hypothetical protein                                                | cc                | TACTTCCAATCCAATTTAATGCTGCCCGTCCGGGG       | TCCTCCACTTCCAATTTAGCTCGGCGCAGCCGGTTCG       | 1603      | EcoRV      | pred Ct match RNAseq, UTR longer |
| TGME49_118510 | N-ethylmaleimide-sensitive factor                                   | cc                | TACTTCCAATCCAATTTAATGCCAGCACCCTTGCAGATC   | TCCTCCACTTCCAATTTAGCGAAGGGCATTGGGTCTAAC     | 1939      | SnaBI      | pred Ct match RNAseq             |
| TGME49_095460 | got1-like family domain-containing protein                          | cc                | TACTTCCAATCCAATTTAATGCCGGTCTGTGCTCGGAGG   | TCCTCCACTTCCAATTTAGCATACGGCAAGCGGCTTTGTG    | 353       | ApaI       | pred Ct match RNAseq             |
| TGME49_070070 | vesicle trafficking protein, putative                               | See fig           | TACTTCCAATCCAATTTAATGCATGCCGCTCAGGACC     | TCCTCCACTTCCAATTTAGCGAGGAAGAGTTTCCAGAAAA    | 1337      | StuI       | pred Ct match RNAseq             |
| TGME49_111690 | hypothetical protein                                                | NS                | TACTTCCAATCCAATTTAATGCATCCCGGGGGCGGAGC    | TCCTCCACTTCCAATTTAGCGTGTGAGAAGACGATCAATCG   | 766       | BstBI      | pred Ct match RNAseq             |
| TGME49_007090 | hypothetical protein, conserved                                     | cc                | TACTTCCAATCCAATTTAATGCGGCTTCTGCTTTATCCG   | TCCTCCACTTCCAATTTAGCTTCTATCCGAAIACAAGACGC   | 1572      | SnaBI      | Ct doesn't match                 |
| TGME49_039680 | hypothetical protein, conserved                                     | Apicoplast        | TACTTCCAATCCAATTTAATGCTGAGTCCGGCCAAACCTCC | TCCTCCACTTCCAATTTAGCAAGTTTGTGTTGAGCGGTAC    | 1195      | MluI       |                                  |
| TGME49_094250 | hypothetical protein                                                | NS                | TACTTCCAATCCAATTTAATGCTACTCTCGCTACGGGATCC | TCCTCCACTTCCAATTTAGCTTTTCCGGAGGATAGAAAC     | 2948      | PshAI      | Ct doesn't match                 |
| TGME49_059520 | hypothetical protein                                                | NS                | TACTTCCAATCCAATTTAATGCTATGGGATGGATGGAGAG  | TCCTCCACTTCCAATTTAGCGCGAGGCACCAAGCTGTAA     | 1722      | BstBI      | pred Ct match RNAseq             |
| TGME49_046470 | hypothetical protein, conserved                                     | NS                | TACTTCCAATCCAATTTAATGCTGCTGCCCTCTCACTG    | TCCTCCACTTCCAATTTAGCCAGGACGTTTTCAGGCTGGAG   | 1846      | NheI       | Ct doesn't match                 |
| TGME49_068010 | protein kinase, PfEST homolog                                       | Nucleus           | TACTTCCAATCCAATTTAATGCGGATTCAGCCTTCGAGAA  | TCCTCCACTTCCAATTTAGCTGCGGGACTTCTGCTTCCCTT   | 1216      | PstI       |                                  |
| TGME49_017690 | hypothetical protein                                                | Golgi             | TACTTCCAATCCAATTTAATGCAGAAAGTCCGGGAGAACA  | TCCTCCACTTCCAATTTAGCTTCTGCTTCCCACTTCTTCC    | 1337      | BglII/MluI |                                  |
| TGME49_091670 | RNA helicase, putative                                              | Apicoplast        | TACTTCCAATCCAATTTAATGCATTTGGGAACTTCGGTGT  | TCCTCCACTTCCAATTTAGCAATTTTATAGGCAATTCGCTTCT | 1370      | EcoRV      |                                  |
| TGME49_014560 | hypothetical protein                                                | Nucleus           | TACTTCCAATCCAATTTAATGCCACCCGGCGCGGTTCTG   | TCCTCCACTTCCAATTTAGCGGATGGTGTTCGCCAGATCC    | 1083      | NruI/BstBI |                                  |
| TGME49_061680 | hypothetical protein                                                | Nucleus           | TACTTCCAATCCAATTTAATGCTTTCAGGCCCGCAAG     | TCCTCCACTTCCAATTTAGCGGCTCAAGTCCCGGAGTGA     | 1956      | PstI       |                                  |
| TGME49_105800 | hypothetical protein, conserved                                     | Vesicles          | TACTTCCAATCCAATTTAATGCCGCTGCTGTTGGTGG     | TCCTCCACTTCCAATTTAGCAACCTCTCCGAAAAGATG      | 984       | XcmI       | pred Ct match RNAseq             |
| TGME49_113640 | hypothetical protein                                                | NS                | TACTTCCAATCCAATTTAATGCCCTGTTTCCCTGGCCGT   | TCCTCCACTTCCAATTTAGCGGAGCCACTGTTTCTTGT      | 584       | SnaBI      | pred Ct match RNAseq             |
| TGME49_036530 | hypothetical protein                                                | NS                | TACTTCCAATCCAATTTAATGCATGCTGCTGCTGCTGTAAG | TCCTCCACTTCCAATTTAGCGGACTGTGCGCTCCCGGCT     | 925       | NruI       | Ct doesn't match                 |
| TGME49_067050 | hypothetical protein                                                | Cytosol           | TACTTCCAATCCAATTTAATGCTGCTGCTGCTGCTGTAAG  | TCCTCCACTTCCAATTTAGCGGCTTCTTGCAGCTGAGGC     | 1235      | NruI       |                                  |
| TGME49_049310 | hypothetical protein                                                | NS                | TACTTCCAATCCAATTTAATGCTTTTGGAGCGGGGAAC    | TCCTCCACTTCCAATTTAGCTTCAAGAAAGTCCCGGAGCC    | 1383      | PstI       | pred Ct match RNAseq, UTR longer |
| TGME49_001270 | hypothetical protein                                                | Apicoplast        | TACTTCCAATCCAATTTAATGCCGAGGTGGTTCGTTAGG   | TCCTCCACTTCCAATTTAGCACAACAACCTGATATCTTT     | 1574      | StuI       |                                  |
| TGME49_046770 | hypothetical protein                                                | Nucleus           | TACTTCCAATCCAATTTAATGCAGCAGGTGCCCGAAC     | TCCTCCACTTCCAATTTAGCCGAGCGGTTTAGACGGGC      | 1692      | BstBI      |                                  |

CC - Cannot be Cloned

NS - No Signal detected in IFA with stably transfected parasites

Result of attempt and DNA cloning information for tagging of 57 apicoplast proteins encoding genes

|               |                                 |            |                                                     |                                                     |      |           |                                  |
|---------------|---------------------------------|------------|-----------------------------------------------------|-----------------------------------------------------|------|-----------|----------------------------------|
| TGME49_032440 | hypothetical protein            | ER         | TACTTCCAATCCAATTTAATGCAATGGCGCTCTGCGGAAG            | TCCTCCACTTCCAATTTAGCCTCCCTCCGTGCTTCTGCGTC           | 918  | SnaBI     | pred Ct match RNAseq             |
| TGME49_091810 | hypothetical protein            | See fig    | TACTTCCAATCCAATTTAATGCGAGTGTACGTACGCAGGC            | TCCTCCACTTCCAATTTAGCATTGTTGTCCGACTCGTCATC           | 1931 | XcmI      |                                  |
| TGME49_085510 | hypothetical protein            | NS         | TACTTCCAATCCAATTTAATGCGAGCCAGACTTCGTTGIGA           | TCCTCCACTTCCAATTTAGCGGCTCCCGGATTCGGGCGCA            | 1187 | MluI      | pred Ct match RNAseq             |
| TGME49_054520 | hypothetical protein            | NS         | TACTTCCAATCCAATTTAATGCGTTCGGCGTTACTGTGCT            | TCCTCCACTTCCAATTTAGCAGAGCCTGGCGCCGAGTCTG            | 493  | PshAI     | pred Ct match RNAseq, UTR longer |
| TGME49_020600 | hypothetical protein, conserved | Vesicles   | TACTTCCAATCCAATTTAATGCACTGCACCATCCCTCGT             | TCCTCCACTTCCAATTTAGCGGCCATCTCGACAGCATGCG            | 1991 | NheI      | pred Ct match RNAseq             |
| TGME49_033340 | hypothetical protein            | ER         | TACTTCCAATCCAATTTAATGCGGACAACCTGGGTGCGC             | TCCTCCACTTCCAATTTAGCCTTACTTTTCACACTCCGATC           | 897  | PstI/MluI | pred Ct match RNAseq, UTR longer |
| TGME49_024150 | hypothetical protein            | Golgi      | TACTTCCAATCCAATTTAATGCAACAGAGGGCGGCGGT<br>TCCTCG    | TCCTCCACTTCCAATTTAGCCACATCGAGAAGCAGAGCGA<br>CAICTCC | 1040 | NruI      |                                  |
| TGME49_039320 | hypothetical protein, conserved | Apicoplast | TACTTCCAATCCAATTTAATGCAACAGAAGGGTGTATGG<br>ACCTGGCG | TCCTCCACTTCCAATTTAGCGTCTGAGGCCTCTGCATGAAT<br>AGCC   | 1281 | MluI      |                                  |
| TGME49_047410 | hypothetical protein            | NS         | TACTTCCAATCCAATTTAATGCTGCGTGTATTTCTTTGGG            | TCCTCCACTTCCAATTTAGCCACTCGGTACCGATCTTGCTT           | 1418 | PstI      | pred Ct match RNAseq, UTR longer |
| TGME49_084620 | hypothetical protein            | NS         | TACTTCCAATCCAATTTAATGCAAGTACACCTGGCTGAA             | TCCTCCACTTCCAATTTAGCGTCTGCTTTTCGGACCTTTC            | 1539 | StuI      | Ct doesn't match                 |
| TGME49_002440 | hypothetical protein            | Apicoplast | TACTTCCAATCCAATTTAATGCCTCTGGACCGAATCCGGA<br>GAAGACC | TCCTCCACTTCCAATTTAGCCTGGGGTTCTCAGTGTCCG<br>GTTTACG  | 1485 | PstI      |                                  |
| TGME49_016630 | hypothetical protein, conserved | Vesicles   | TACTTCCAATCCAATTTAATGCTGCAGATCCCTGATGGAG<br>GGTTGCC | TCCTCCACTTCCAATTTAGCCTCGTCTCCGGTTTGAGGG<br>GAGGTGG  | 1642 | MluI      | pred Ct match RNAseq, UTR longer |
| TGME49_059230 | hypothetical protein            | Apicoplast | TACTTCCAATCCAATTTAATGCGCTCGCAGACTTGCTGG<br>CCTG     | TCCTCCACTTCCAATTTAGCGACATTGAAGTCTTCAGGC<br>CTTCTTTG | 1276 | MluI      |                                  |
| TGME49_024570 | hypothetical protein            | NS         | TACTTCCAATCCAATTTAATGCGCTGCACAGGCGC                 | TCCTCCACTTCCAATTTAGCAGAAACAGTCAGGAAGTGA<br>AAAGTTC  | 931  | BmgBI     | pred Ct match RNAseq, UTR longer |
| TGME49_082150 | hypothetical protein            | Apicoplast | TACTTCCAATCCAATTTAATGCCAGGGCGTCCAGCCGCC<br>GGTCCC   | TCCTCCACTTCCAATTTAGCTCCACAGCCTCTTGACGTC             | 1250 | XcmI      |                                  |

CC - Cannot be Cloned

NS - No Signal detected in IFA with stably transfected parasites
