# Supplementary material for: A Systematic Screen to Discover and Analyze Apicoplast Proteins Identifies a Conserved and Essential Protein Import Factor
Source: PubMed Central journal article supplement (PMC3228799; doi:10.1371/journal.ppat.1002392), 2011-12-01
Supplement: ppat.1002392.s010.pdf [file ppat.1002392.s010.pdf]

Other primers used in this study (not included in TableS3)

| Primer number | Sequence                                                                       | Restirction enzyme | Description                                              | Purpose                                                    |
|---------------|--------------------------------------------------------------------------------|--------------------|----------------------------------------------------------|------------------------------------------------------------|
| 1525          | cgggattaattacgccccgcctgcc                                                      |                    | Reverse CAT                                              |                                                            |
| 1524          | ggcagggcggggcgtaattaacaccg                                                     |                    | Forward CAT                                              | mutate PacI site in CAT ORF in pLIC_CAT                    |
| 2156          | cccgatataatcatcgctgtagcttatttccg                                               | EcoRV              | forward TpPPP1 pNR                                       |                                                            |
| 2158          | cccggtaccaactactgattcaacgacaatcc                                               | KpnI               | reverse TpPPP1 pNR                                       | GFP-tag TpPPP1 and express in Tp                           |
| 1380          | caaaatctgcatggtctagccgactctcttcttctctcgcg<br>caaaaggtaccctacgactgctcccggaactac |                    | forward primer to modify ToxoY50                         |                                                            |
| 1381          | ttgtcaagaccgctgacggcatttttctgaaagcaatgctc<br>gtttatagactcactataggcgcaattgg     |                    | reverse primer to modify ToxoY50                         | cosmid recombineering for KO of TgKu80                     |
| 1410          | ccgggacgtctacgggtacc                                                           |                    | reverse in cosmid modification cassette                  |                                                            |
| 1408          | ccggggacgctcgcagtgcc                                                           |                    | reverse downstream of end of TOXOY50 cosmid              |                                                            |
| 1412          | cagggtcagttgaggatgctc                                                          |                    | forward in Ku80 first intron                             |                                                            |
| 2305          | ggtcgagatggcccgacgg                                                            |                    | forward for TgKu80 southern probe                        |                                                            |
| 2306          | gcgaatgaggaaagagacacctc                                                        |                    | reverse for TgKu80 southern probe                        | confirm integration for TgKu80 KO                          |
| G13_CosMod_F  | caggagaaaatgcccgatgcttggggcccgctgttgcga<br>tgccactgaggtaccgctacgacgtcccggactac |                    | forward primer to modify ToxoW30                         |                                                            |
| G13_CosMod_R  | cacgctgccttttattgttttgcattccctctgcaactaca<br>taccatagactcactataggcgcaattgg     |                    | reverse primer to modify ToxoW30                         |                                                            |
| 1808          | gcaaacgaggggaaatggaagc                                                         |                    | reverse downstream to cosmid ToxoW30 to test integration | cosmid recombineering for KO of PPP1                       |
| 1683          | gggagatctggcctctctctctccacc                                                    | BglIII             | forward to test potential start sites                    |                                                            |
| 1684          | gggagatctagatccccttttctgcgcc                                                   | BglIII             | forward to test potential start sites                    |                                                            |
| 1685          | gggagatctatgtcacaccctctgtactctc                                                | BglIII             | forward to test potential start sites                    |                                                            |
| 1686          | gggagatctagacgggtgaggttcggac                                                   | AvrII              | forward to test potential start sites                    |                                                            |
| 1687          | ggcgctagccatacaaaagttaacgctgagcc                                               | AvrII              | reverse to clone with Myc tag                            | test PPP1 gene model and express ectopic copy              |
| 1756          | cccctatggtacgcttcaactacagctc                                                   | NdeI               | reverse to amplify PPP1 Pre-promoter region              |                                                            |
| 1759          | ggcgatagcctatcctgcttctactctgg                                                  | NdeI               | forward to amplify PPP1 Pre-promoter region              | PPP1 promoter replacement                                  |
| 1154          | cgcacggcagtcagataacagctgta                                                     |                    | reverse in DHFR cassette                                 |                                                            |
| 1592          | cgcttggcgaatgttcatgac                                                          |                    | forward on T7S4 promoter                                 | confirm integration for promoter replacement               |
| 2304          | cctcgattcctctctccggc                                                           |                    | forward for PPP1 southern probe                          | southern blot probe                                        |
| 1913          | gggagatctatggcactccgcatcgggagg                                                 | BglIII             | forward to test potential start sites                    |                                                            |
| 1914          | gggagatctatggcagctctctgtcttgc                                                  | BglIII             | forward to test potential start sites                    |                                                            |
| 1915          | gggagatctatgcttctgtacccgc                                                      | BglIII             | forward to test potential start sites                    |                                                            |
| 1916          | ggcgctaggaagtgtgtgagcgtactgg                                                   | AvrII              | reverse to clone with Myc tag                            | test TGME49_039680 gene model and express ectopic copy     |
| 2088          | gggattaatggtgactccgctcttttctcg                                                 | MseI               | TGME49_039680_PR_F                                       |                                                            |
| 2089          | cccattattcattgttccgtttcagaccgtg                                                | MseI               | TGME49_039680_PR_R                                       | TGME49_039680 promoter replacement                         |
| 2293          | ggcacacaagaatccggg                                                             |                    | reverse to test PR                                       |                                                            |
| 2292          | ggcagctggagagaaggaggcaagcc                                                     |                    | forward to test PR                                       | confirm integration for TGME49_039680 promoter replacement |
| 1382          | tactccaatccaattaatgagactatgtaacgcagacg                                         |                    | forward ACP in LIC                                       |                                                            |
| 1383          | tctccaactccaatttatgcccgtgtagcgtctctgagtc                                       |                    | reverse ACP in LIC                                       | ACP tagging endogenously                                   |
